1 **Title:** Distinct brain networks coupled with the parietal cortex represent target

2 location inside and outside the visual field

3 **Abbreviated title:** Brain networks represent target locations in visual field

4 **Authors:** Bo Zhang <sup>1</sup>, Fan Wang <sup>5,6,7</sup>, Naya Yuji <sup>1, 2, 3, 4, \*</sup>

5 **Affiliations:**

6 <sup>1</sup> School of Psychological and Cognitive Sciences, Peking University, No. 52, Haidian Road,  
7 Haidian District, Beijing 100805, China

8 <sup>2</sup> IDG/McGovern Institute for Brain Research at Peking University, No. 52, Haidian Road,  
9 Haidian District, Beijing 100805, China

10 <sup>3</sup> Center for Life Sciences, Peking University, No. 52, Haidian Road, Haidian District,  
11 Beijing 100805, China

12 <sup>4</sup> Beijing Key Laboratory of Behavior and Mental Health, Peking University, No. 52, Haidian  
13 Road, Haidian District, Beijing 100805, China

14 <sup>5</sup> State Key Laboratory of Brain and Cognitive Science, Institute of Biophysics, Chinese  
15 Academy of Sciences, 15 Datun Road, Beijing 100101, China

16 <sup>6</sup> CAS Center for Excellence in Brain Science and Intelligence Technology

17 <sup>7</sup> University of Chinese Academy of Sciences, 19A Yuquan Road, Beijing 100049, China

18 **Corresponding author:** Yuji Naya

19 Address: School of Psychological and Cognitive Sciences, Peking University, No. 52,

20 Haidian Road, Wang Kezhen Building, Room 1707, Haidian District, Beijing 100805, China

21 E-mail: yujin@pku.edu.cn

22 **Conflict of interest statement:** no competing financial interests

23 **Acknowledgments:** This work was supported by the National Natural Science Foundation of  
24 China Grant 31421003 (to Y.N.). We thank the National Center for Protein Sciences at  
25 Peking University for assistance with MRI data collection, and the State Key Laboratory of  
26 Brain and Cognitive Science at Chinese Academy of Sciences for assistance with MEG  
27 scanning, which was supported in part by the Ministry of Science and Technology of China  
28 grant (2019YFA0707103), the National Nature Science Foundation of China grant  
29 (31730039), and the Strategic Priority Research Program of Chinese Academy of Science  
30 (XDB32010300). Computational work was supported by resources provided by the High-  
31 performance Computing Platform of Peking University.

## 32 **Abstract**

33 Our mental representation of the egocentric space is influenced by the disproportionate  
34 sensory perception along the ventral-dorsal (i.e., front-back) axis of the body. Previous  
35 studies typically investigated the neural architectures involved in the egocentric  
36 representations within the visual field and revealed a crucial involvement of the parietal  
37 cortex and its interaction with the frontal lobe. However, neural architectures involved in the  
38 space representation behind self-body are still unclear. To address this problem, we applied  
39 both functional magnetic resonance imaging (fMRI) and magnetoencephalography (MEG) to  
40 a 3D spatial-memory paradigm for human participants, in which the participants remembered  
41 a target location within (left or right) or outside (back) their visual field. Both fMRI and  
42 MEG experiments showed that the involvements of the fronto-parietal network including the  
43 frontal eye field and supplementary motor area were larger in the representations of retrieved  
44 target object within the visual field than outside. Conversely, the medial temporal lobe  
45 (MTL)-parietal network, including the right entorhinal cortex, was more involved in the  
46 target representation when the target was outside the visual field in both the experiments. In  
47 the MEG experiment, the connectivity increased in alpha-band frequency (8–13 Hz) in both  
48 fronto-parietal and MTL-parietal networks, and the preferential enhancement of the MTL-  
49 parietal network for the back preceded that of the fronto-parietal network for left/right. These  
50 findings suggest that the parietal cortex may represent whole space around self-body by  
51 coordinating the two distinct brain networks to process the egocentric spatial representation  
52 inside and outside the visual field.

53

## 54 **Significance Statement (120 words maximum)**

55 Representations of external space around self-body are necessary for coordinated actions, and  
56 our sensory-motor system is strongly biased toward processing the space in front. However,

57 space exists behind us too. We conducted both fMRI and MEG studies and found that the  
58 parietal cortex coupled with the frontal lobe (FEF and SMA) and medial temporal lobe (MTL)  
59 represents a target inside and outside the visual field, respectively, although the target  
60 location was retrieved from short-term memory in both conditions. These results suggest that  
61 the parietal cortex may represent the whole of the present external space by interacting (alpha  
62 rhythm) with the frontal lobe for subsequent actions and the MTL to inquire the back scene.

63

64 Key words: egocentric direction, fMRI, MEG, parietal cortex, entorhinal cortex

65

## 66 **Introduction**

67 When we plan to reach for a target, it is necessary to attain its location information in the  
68 body-centered reference frame or the so-called “egocentric” spatial coordinate (Stein, 1989;  
69 Shelton and McNamara, 1997; Burgess, 2006). Previous studies using humans and nonhuman  
70 primates as subjects indicated crucial involvements of the parietal cortex in the  
71 representations of egocentric location for sensory perception, motor action, and their  
72 coordination (Khan, 2008; Ciaramelli et al., 2010; Iriki and Taoka, 2012; Wang et al., 2016;  
73 Zhou et al., 2018). Anatomically, the parietal cortex is located at the final stage of the dorsal  
74 pathway, which is often named either “where” or “how” pathway (Goodale and Milner 1992;  
75 Ungerleider et al., 2008). Perceptual signals including visual and somatosensory information  
76 thus converge on the parietal cortex, which interacts with the frontal eye field (FEF)—the  
77 region associated with attention and eye movement toward a target in the external space  
78 around the self (Stein, 1992; Desmurget et al., 1999; Donner, 2000). These anatomical  
79 connection patterns are consistent with those reported by neuropsychological studies, i.e., a  
80 damaged parietal cortex shows impaired egocentric spatial awareness known as  
81 hemispherical neglect, which leads to neglect of a target on one side of a field of vision  
82 (Vallar, 1998). Hemispherical neglect appears not only in perception but also in the memory  
83 field, known as “representational neglect” (Bisiach and Luzzatti, 1978). With accumulating  
84 human imaging studies examining spatial navigation and episodic recollection (Farrer and  
85 Frith, 2002; Spiers and Maguire, 2007; Gaesser et al., 2013; Chadwick et al., 2015; Suarez-  
86 Jimenez et al., 2018), the parietal cortex is considered to represent the egocentric space for  
87 both perception and memory.

88 Mnemonic representations of the egocentric space bring the question of whether the  
89 spatial representation differs between the inside and outside of a visual field. While the  
90 former can be represented in both vision and memory, the latter can be represented only in

91 memory. Previous human behavioral studies reported a decreased performance (Attneave,  
92 1977) or prolonged response latency (Sholl, 1987) when participants located a target behind  
93 them. This phenomenon, known as “alignment effect” (Presson, 1984) or “front facilitation”  
94 (Kelly, 2009), suggests that the space surrounding our body is coded heterogeneously by  
95 different neural system depending on whether a target is inside or outside the visual field  
96 (Kelly, 2009). To explore the neural architectures responsible for the representation of  
97 egocentric space, previous studies mostly examined the target representation within the visual  
98 field; however, one previous neuroimaging study, which examined target representation  
99 outside the visual field, suggested that the parietal cortex codes unseen egocentric spaces  
100 (Schindler, 2013). However, the target representation of inside/outside of the visual field on  
101 the parietal cortex and its interactions with associated brain areas are still unsolved.

102         To characterize neural architectures supporting the mental representations of  
103 egocentric space inside and outside the visual field in the present study, we applied both  
104 functional magnetic resonance imaging (fMRI) and magnetoencephalography (MEG) to a  
105 spatial-memory paradigm using a 3D virtual environment for human participants, which we  
106 recently devised (Zhang and Naya, 2020) (Fig. 1a). In this paradigm, participants encoded a  
107 spatial relationship among three objects (walking period) in each trial. While the same three  
108 objects were used across trials, their spatial relationship was different in each trial. After the  
109 walking period, the participants faced one object (facing period), following a presentation of  
110 a target object (targeting period). The participants remembered the location of the target  
111 object relative to self-body. To-be-remembered targeting locations could be on the left, right,  
112 or back position of the participants’ egocentric spaces. This spatial-memory paradigm  
113 allowed us to compare the neural representations of egocentric space between inside (i.e.,  
114 left/right condition) and outside (i.e., back condition) of the visual field (Knapp, 1938).

115

## 116 **Materials and Methods**

117

### 118 **Participants**

119 Nineteen and twelve right-handed university students with normal or corrected-to-normal  
120 vision were recruited from Peking University for fMRI and MEG experiments, respectively  
121 (fMRI: 12 women, 7 men; MEG: 4 women, 8 men). The average ages of the participants  
122 recruited for fMRI and MEG experiments were 24.9 years (range: 18–30 years) and 22.5  
123 years (range: 19–25 years), respectively. None of the participants had a history of psychiatric  
124 or neurological disorders; all of them provided written informed consent prior to the start of  
125 the experiment, which was approved by the Research Ethics Committee of Peking University.

126

### 127 **Experimental design**

128 *Experimental design:* The details of the present design were described previously (Zhang and  
129 Naya, 2020). A 3D virtual environment was programmed using Unity platform (Unity  
130 Technologies, San Francisco). In the environment, three animate 3D human characters  
131 (Mixamo, San Francisco, <https://www.mixamo.com>) were placed on three out of four  
132 locations pseudo-randomly across trials (Fig. 1a). Participants performed the task using first-  
133 person perspective with a 90° field of view (aspect ratio = 4:3) and had never seen a top-  
134 down view of the virtual environment. Experimental stimuli were presented through an LCD  
135 projector with a resolution of 1024 × 768 pixels.

136 *Spatial-memory task:* The task included 144 and 72 trials in the MRI and MEG  
137 experiments, respectively. In each trial, participants walked from one of four starting  
138 locations toward the human characters and stopped at the center of a wood plate. After the  
139 walking period, participants experienced a “facing period” and a “targeting period”  
140 sequentially. In the facing period, one of the human characters was presented in the center of

141 the display with the environmental background for 2.0 s (MRI) or 1.0 s (MEG) as a facing-  
142 character with the other two characters being invisible. In the targeting period, a photo of one  
143 of the remaining characters (named as “targeting-character”) was presented as a target on a  
144 scrabbled background for 2.0 s (MRI) or 1.0 s (MEG). Each of the three periods was  
145 followed by a 2.0 s (MRI) or 1.0 s (MEG) delay (noise screen). At the end of each trial,  
146 participants indicated the direction of the target relative to their self-body by pressing a  
147 button when a cue was presented.

148 We inserted head-nodding detection (HND) trials in the spatial-memory task (16 trials  
149 for MRI and 36 trials for MEG). In the HND trials, a photo of one of the human characters  
150 was presented after the walking period, and then the participants were asked to indicate  
151 whether the human character nodded its head or not during the walking period. Each human  
152 character nodded its head in a probability of 20.6% at a random time point between the start  
153 and end of walking in the HND trials. Because the trial-types were indistinguishable during  
154 the walking period, the participants were required to pay attention to the head-nodding of the  
155 human characters during the walking period, which would reduce the possibility of voluntary  
156 memorization of the spatial relationship of the three objects. Post-scanning interviews  
157 showed that none of the participants made efforts to memorize the spatial relationship (Zhang  
158 and Naya, 2020).

159 *MEG control conditions:* Two control conditions (36 trials for each) were added to the  
160 spatial-memory task in the MEG experiment. In the control conditions, after the walking  
161 period, a white cross was presented instead of a human character during both facing and  
162 targeting periods or during the targeting period (Fig. 4c). The participants were instructed to  
163 rest with eyes opened and fixate on the white cross. After the targeting period, the  
164 participants pressed the button corresponding to a number presented on the screen during the



165 response period. The number was determined randomly from 1 to 4 in each trial of the  
166 control conditions.

167

## 168 **fMRI acquisition and analysis**

169 *MRI scanning parameters:* Blood-oxygen-level-dependent (BOLD) MRI images were  
170 acquired using a 3T Siemens Prisma scanner equipped with a 20-channel receiver head coil.  
171 Functional data were acquired with a Multi-band Echo Planer imaging (EPI) sequence (TR:  
172 2000 ms; TE: 30 ms; matrix size:  $112 \times 112 \times 62$ ; flip angle:  $90^\circ$ ; gap: 0.3 mm; resolution:  $2$   
173  $\times 2 \times 2.3$  mm<sup>3</sup>; number of slices: 62; slice thickness: 2 mm; gap between slices: 0.3 mm; slice  
174 orientation: transversal). The signals of the original voxels (i.e.,  $2 \times 2 \times 2$  mm<sup>3</sup>) were  
175 assigned to the corresponding voxels without gap ( $2 \times 2 \times 2.3$  mm<sup>3</sup>) to construct participants'  
176 native space images. Four experimental sessions were conducted with average 478, 476, 473,  
177 and 475 TRs. A high-resolution T1-weighted three-dimensional anatomical data set was  
178 collected to aid registration (MPRAGE, TR: 2530 ms; TE: 2.98 ms; matrix size:  $448 \times 512 \times$   
179  $192$ ; flip angle:  $7^\circ$ ; resolution:  $0.5 \times 0.5 \times 1$  mm<sup>3</sup>; number of slices: 192; slice thickness: 1  
180 mm; slice orientation: sagittal).

181 *fMRI preprocessing:* BOLD images of each experimental session were preprocessed  
182 independently using FSL FEAT (FMRIB's Software Library, version 6.00,  
183 <https://fsl.fmrib.ox.ac.uk/fsl/fslwiki>; Woolrich et al., 2001; Woolrich et al., 2004). For each  
184 session, the first three functional volumes were discarded to allow for T1 equilibration, and  
185 the remaining functional volumes were slice-time corrected, realigned to the first image,  
186 high-pass filtered at 100 s, and smoothed using a 5-mm FWHM Gaussian filter.

187 *Univariate analysis:* The 4-s BOLD signals of the targeting period were modeled using  
188 univariate general linear models (GLM) with the three egocentric directions (left, right, back)  
189 included as regressors. To remove nuisance effects, an additional twenty-six regressors were

190 included: twelve for modeling the visual patterns of the walking period (3 spatial  
191 arrangements of human characters  $\times$  4 walking directions), four for the body turning-  
192 direction (turn left or turn right) and turning-angle ( $135^\circ$  or  $45^\circ$ ) during the facing period,  
193 three for the response key pressed in the response period, one for HND trials, and six for  
194 motion parameters. This procedure generated three parameter maps of egocentric directions  
195 in participant's native space ( $2 \times 2 \times 2.3$  mm voxels). For group-level statistical analysis, the  
196 activity parameter maps were averaged across four scanning sessions and registered to a T1-  
197 weighted standard image (MNI152) using FSL FLIRT (Jenkinson and Smith 2001; Jenkinson  
198 et al. 2002); this procedure also resampled the voxel size into the  $2 \times 2 \times 2$  mm<sup>3</sup> resolution  
199 before subjecting the data to two-tailed t-test.

200 *Connectivity analysis:* To examine the functional connectivity of the parietal cortex and  
201 precuneus inside and outside the visual field, a GLM was created to remove the nuisance  
202 covariates from the preprocessed functional data. The signal averaged over the lateral  
203 ventricles, white matter, and whole brain and six motion parameters, and their derivatives  
204 were specified as regressors. The residual signals were bandpass-filtered leaving signals  
205 within the frequency range of 0.01–0.1 Hz and shifted by two TR intervals (4 s) (Tompariy  
206 and Davachi, 2017). The residual signals were registered to a T1-weighted standard image  
207 (MNI152) using FSL FLIRT (Jenkinson and Smith 2001; Jenkinson et al. 2002) with the  
208 voxel size resampled to a resolution of  $2 \times 2 \times 2$  mm<sup>3</sup>. The regional time courses of targeting  
209 period were then extracted from the anatomical masks of the parietal cortex and precuneus on  
210 the basis of the AAL template (Rolls et al., 2015). To do this, we averaged signals over the  
211 mask at each TR within the period and then concatenated the two TRs in a trial with those in  
212 the next trial for each of the egocentric directions in a session (Ranganath et al., 2005, 24 TRs  
213 in total: 2 TRs  $\times$  12 trials). The regional time course was then correlated with the time course  
214 of each voxel in the rest of the brain, which yielded a whole-brain correlation map for inside

215 (left and right) and outside (back) of visual field separately. For group-level statistical  
216 analysis, the correlation maps were averaged across four scanning sessions before subjecting  
217 them to a two-tailed t-test.

218

### 219 **MEG acquisition and analysis**

220 *MEG scanning parameter:* Neuromagnetic signals were recorded with a 275-channel whole-  
221 head axial gradiometer MEG system DSQ-3500 (CTF MEG, Canada) at the sampling rate of  
222 1200 Hz. A third-order synthetic gradiometer and linear drift corrections were applied to  
223 remove far-field noise. To measure head position within the MEG helmet, three head position  
224 indicator (HPI) coils were attached to the nasion and two preauricular points of each  
225 participant to coregister their head position with the sensor coordinate system. During  
226 scanning, a customized chin-rest equipment compatible with MEG was prepared to ensure  
227 that head movements did not exceed 2 mm. After MEG recording, each participant  
228 underwent anatomical MRI scans on a 3T Siemens Prisma scanner (voxel size: 1 mm<sup>3</sup>; flip  
229 angle: 9; TE: 1.97 ms; TR: 2,300 ms; field of view: 256 × 256 × 176 mm<sup>3</sup>); three MRI  
230 markers were attached to the same location of HPI coils to align each participant's  
231 anatomical image to the MEG sensor positions.

232 *MEG preprocessing:* The raw MEG data were preprocessed and analyzed using the MNE  
233 Python toolbox (v0.19; available at: <https://mne.tools/stable/index.html>)(Gramfort et al, 2013;  
234 Gramfort et al, 2014). The time series were bandpass-filtered between 1 and 100 Hz offline.  
235 To verify the data quality and remove artifacts, such as eye movements, eye blinks, and  
236 cardiac and environmental noises, independent component analysis (ICA) was performed,  
237 and visually inspection was applied after ICA artifact removal. The preprocessed time series  
238 were epoched from 0.2 s before the onset of targeting period to the end of subsequent noise

239 period (2.2 s duration) for each of left, right, back, and control conditions; the epochs were  
240 downsampled to 200 Hz to increase the processing speed in later steps (Grenander, 1959).  
241 *Sensor-space analysis:* From the neural activity indexed by the strength of magnetic field on  
242 sensor space, the mean activity during the 0.2-s period preceding the onset of targeting period  
243 in each trial was subtracted. To extract the difference in neural activity between the  
244 egocentric location inside (left and right) and outside (back) the visual field of view, a  
245 contrast analysis was performed between the mean of left/right condition and back condition  
246 for each sensor. Another contrast analysis was performed to examine the main effect of the  
247 three egocentric locations relative to the control conditions. The contrasted neural activity on  
248 sensor space was then subjected to two-tailed t-test for group-level statistical analysis.  
249 *Source space analysis:* To reconstruct the spatial-temporal activity from sensor space to  
250 anatomical space, the forward model was created using single-compartment (inner skull)  
251 boundary-element method (BEM) on the basis of each participant's anatomical image, and  
252 the spatial-temporal activity was then inversely modeled using the dynamic statistical  
253 parameter map in each source point and time (Dale et al., 2000). The source space was  
254 estimated using a subsampling strategy, which involved subdividing a polygon (oct6) using  
255 the spherical coordinate system provided by FreeSurfer, producing 4098 source points per  
256 hemisphere with an average source spacing of 4.9 mm (assuming a surface area of 1000  
257 cm<sup>2</sup>/hemisphere)(Fischl et al., 1999; Gramfort et al., 2013). Noise covariance matrix was  
258 derived from the baseline period (-0.2 s to 0 s relative to targeting period). The source space  
259 of each participant was morphed to an fsaverage surface before submitting to group-level  
260 statistical analysis. The percentile rank of source-power strength from top 5% to 1% was  
261 calculated for either each of egocentric locations or the contrast between the left/right and  
262 back. For ROI analysis, we manually delineated each of the medial temporal lobe (MTL)  
263 subareas (HPC, PHC, PRC, ERC) on participant's native space using established protocols

264 (Insausti et al., 1998; Pruessner et al., 2000; Pruessner et al., 2002; Duvernoy, 2005) as well  
265 as the delineating software ITK-SNAP ([www.itksnap.org](http://www.itksnap.org)). The mean source-power within  
266 the MTL subareas was calculated by averaging the source-power within each mask for each  
267 of egocentric locations before subjecting the data to group-level statistical analysis.

268 *Connectivity analysis:* To access the connectivity of the parietal cortex and precuneus with  
269 the frontal lobe (FEF/SMA) and MTL subareas in each temporal domain revealed by the  
270 MEG contrast analysis [i.e., ‘early’ (0.25-0.37 s after the onset of targeting period) for the  
271 back and ‘late’ (0.67-0.85 s) for the left/right], we examined the phase synchronization of  
272 MEG time series for the following four frequency bands: alpha (8-13 Hz), beta (13-30 Hz),  
273 low-gamma (30-60 Hz), and high-gamma (60-99 Hz) bands. We extracted the MEG time  
274 series using a 400 ms time windows for each of the “early” and “late” periods to ensure that  
275 at least three cycles of source time series could be covered in alpha band (Hu and Zhang,  
276 2019). To do so, we first calculated powers of the MEG signal using all frequency bands in  
277 the time windows of 400 ms centering on the time points within the two time periods. We  
278 then selected a time window that had the maximum power for each time period. This  
279 procedure resulted in two time series (0.08-0.48 s and 0.56-0.96 s for the “early” and “late”  
280 periods, respectively). The phase synchronization was tested among the eight ROIs (parietal  
281 cortex, precuneus, FEF, SMA, and right MTL subareas) for each time series, condition (left,  
282 right or back), and frequency band using phase lag index (PLI) (Stam et al., 2007; Colclough  
283 et al., 2016) and the built-in function of MNE Python toolbox (Gramfort et al, 2013;  
284 Gramfort et al, 2014). Subsequently, the connectivity contrast analysis (“back”–“left/right”)  
285 was performed before subjecting the data to group-level statistical analysis.

286

287 **Statistical analysis**

288 An initial threshold of  $P < 0.01$  was applied to the whole-brain statistics of MRI univariate  
289 and connectivity analyses. The reliability of clusters was tested using a nonparametric  
290 statistical inference that does not make assumptions about the distribution of the data  
291 (Nichols and Holmes, 2002; Winkler et al., 2014; Chadwick et al., 2015), The test was  
292 conducted with the FSL randomize package (version v2.9,  
293 <http://fsl.fmrib.ox.ac.uk/fsl/fslwiki/Randomise>), with 5000 random sign-flips; we then  
294 reported clusters with a size higher than 95% of the maximal suprathreshold clusters in  
295 permutation distribution. Data obtained by ROI analysis of MRI BOLD signal, MEG source-  
296 power, and MEG connectivity analysis were tested using either repeated-measures ANOVA  
297 or  $t$ -test. The MEG sensor space analysis used either spatial-temporal cluster permutation test  
298 or spatial cluster permutation test. All statistical tests were two-sided unless otherwise noted  
299 and the significance was determined according to whether the corrected  $P$  value was smaller  
300 than 0.05.

## 301 **Results**

### 302 **Behavioral performance in the spatial-memory task**

303 Nineteen and twelve healthy volunteers participated in the fMRI and MEG experiments,  
304 respectively. The performances in the spatial-memory task exhibited a ceiling effect in both  
305 the experiments (MRI:  $93.6\% \pm 1.5\%$ ; MEG:  $90.4\% \pm 1.9\%$ ) (Fig. 1c). The performances did  
306 not differ among the three target locations (i.e., right, left, and back) in the fMRI [ $F(2,54) =$   
307  $0.82, P = 0.44$ ] and MEG [ $F(2,33) = 0.08, P = 0.93$ ] experiments. These behavioral results  
308 indicated that the participants solved the spatial-memory task accurately in both fMRI and  
309 MEG experiments regardless of the target location in the present study.

310

### 311 **MRI contrast analysis between left/right and back-target location**

312 The neural activity in the fMRI experiment was examined using the 2 s time-window of the  
313 targeting period in which the participants remembered the location of a targeting object (i.e.,  
314 human character) relative to their self-body in the virtual environment. We first investigated  
315 the brain regions that represented the egocentric location of the target object, when it was  
316 inside and outside the visual field, by comparing the mean BOLD signal strengths for the left  
317 and right-target locations (left/right condition) with that for the back-target location (back  
318 condition). A contrast analysis showed a significantly stronger BOLD signal for the left/right-  
319 target location than for the back-target location in the parietal cortex, precuneus, frontal eye  
320 field (FEF), and supplementary motor area (SMA) (Fig. 2a,  $P < 0.01$ , initial threshold,  $P <$   
321  $0.05$ , cluster-corrected for multiple comparison). In contrast, no brain region showed a BOLD  
322 signal for the back-target location that was significantly larger than that shown by any brain  
323 region for the left/right-target location even with the use of a more liberal threshold of  
324 statistical significance ( $P < 0.05$ , uncorrected).

325           The BOLD signal during the targeting period was further examined for each of the  
326 right, left, and back-target locations in each hemisphere of the parietal cortex, precuneus, FEF,  
327 and SMA separately using the eight functional ROIs derived from the contrast analysis in Fig.  
328 2a (i.e., 2 hemispheres, 4 regions, and 3 egocentric locations). The results showed significant  
329 BOLD signal changes across the three target locations for all ROIs ( $P < 0.05$ , repeated-  
330 measures one-way ANOVA, Bonferroni-corrected for multiple comparisons among the brain  
331 regions,  $n = 2 \times 4 = 8$ ). In addition, for all ROIs, a significantly weaker BOLD signal was  
332 found for the back-target condition than for either the left-target or right-target condition (Fig.  
333 2b,  $P < 0.05$ , paired  $t$ -test, Bonferroni-corrected for multiple comparison among combination  
334 of the conditions,  $n = 3$ ). The elevated activities in the left and right conditions indicate that  
335 involvements of those dorsal brain areas in processing a target in the visual field were greater  
336 than those involved in processing the target outside of it although the participants did not  
337 perceive the target location directly under the left/right-target (inside of the visual field) or  
338 back-target condition (outside of the visual field). In addition to the strong activity bias for  
339 the target inside the visual field, the left FEF and bilateral SMA showed significantly  
340 different strengths of BOLD signals between the left-target and right-target conditions [Fig.  
341 2b, the left FEF:  $t(18) = 3.79$ ,  $P = 0.01$ , the left SMA:  $t(18) = 5.50$ ,  $P = 0.0002$ , the right  
342 SMA:  $t(18) = 4.46$ ,  $P = 0.002$ , Bonferroni-corrected for multiple comparison,  $n = 8$ ]. In  
343 contrast with the FEF and SMA, neither the parietal cortex nor precuneus revealed significant  
344 differences in BOLD signal strengths between the left-target and right-target conditions even  
345 when a liberal threshold was used ( $P < 0.05$ , uncorrected). These results might reflect the  
346 distinction in the functions of the frontal lobe (FEF and SMA) and parietal lobe (parietal  
347 cortex and precuneus) with regard to processing egocentric information. The former might be  
348 involved in an action planning (Tanji and Shima, 1994; Schall et al., 1995; Hanes et al., 1995;



349 Amador and Fried, 2004), while the latter might be associated with a spatial representation  
350 (Colby et al., 1995; Merriam et al., 2003).

351

### 352 **MRI functional-connectivity analysis**

353 We subsequently investigated the brain regions that interacted with the parietal cortex and  
354 precuneus for representing an egocentric location of a target object, when it was inside and  
355 outside the visual field. To examine the interactions, we conducted whole-brain functional-  
356 connectivity analysis under the left/right-target and back-target conditions by using the  
357 anatomical ROIs of the parietal cortex and precuneus as the seeds based on the automated  
358 anatomical labeling (AAL) (see method for details). The whole-brain functional-connectivity  
359 analysis showed that, in addition to a mutual connectivity between these brain areas, both the  
360 parietal cortex and precuneus exhibited a significantly higher connectivity to the FEF and  
361 SMA under the left/right-target condition than under the back-target condition (Fig. 3a,  $P <$   
362  $0.01$ , initial threshold,  $P < 0.05$ , cluster-corrected for multiple comparison). This result  
363 indicates the preferential involvements of the FEF, SMA, parietal cortex, and precuneus for  
364 processing a target object in the visual field even though the egocentric object location was  
365 not perceived. In contrast, the parietal cortex but not the precuneus increased the functional  
366 connectivity to the right ERC when a retrieved target location was beyond the visual field  
367 (i.e., back condition) (Fig. 3b,  $P < 0.01$ , initial threshold,  $P < 0.05$ , cluster-corrected for  
368 multiple comparison) although the ERC cluster survived only for a small volume correction  
369 based on the mask for the MTL. We also examined the functional connectivity using the FEF  
370 and SMA seeds and found that these two brain regions exhibited a strong connectivity to the  
371 parietal cortex and precuneus in the left/right-target condition but did not increase functional  
372 connectivity to any other brain regions, including the ERC, in the back-target condition.  
373 These results suggest that a brain network consisting of the parietal cortex and ERC

374 represents a target object beyond the visual field, which is distinct from the other brain  
375 network consisting of the FEF, SMA, precuneus, and parietal cortex that represents a target  
376 object in the visual field.

377

### 378 **MEG temporal-spatial analysis**

379 Although the functional connectivity analysis suggests the occurrence of coupling between  
380 the ERC and parietal cortex for the target representation outside the visual field, an increase  
381 in BOLD signal strength was not detected in the ERC for the back-target condition. One  
382 possible reason behind this result is that the ERC is involved in representing a target outside  
383 the visual field more than inside for only a short duration, which might make it difficult for  
384 the present fMRI study to detect the effect. To address this problem, we conducted a MEG  
385 study using the same spatial-memory task that was used for the fMRI study except for the  
386 time parameters (Fig. 1a).

387 Figure 4a shows the results of contrast analysis that compared the activity strength at  
388 each sensor between the left/right-target and back-target conditions after the onset of  
389 targeting period. We found a cluster of sensors in the left-posterior area, which showed  
390 significantly stronger activity under the left/right-target condition than under the back-target  
391 condition during 0.67–0.85 s after the onset of targeting period ( $P < 0.05$ , initial threshold,  
392 two tailed;  $P = 0.04$ , spatial-temporal cluster-corrected for multiple comparison) (Fig. 4b).  
393 Conversely, no cluster of sensors showed stronger activity under the back-target condition  
394 than under the left/right-target condition. These MEG results were consistent with those of  
395 the fMRI contrast analysis and suggest the predominant spatial-representation processing  
396 within the visual field relative to that outside the visual field.

397 We subsequently examined the effect of egocentric target location by comparing the  
398 activity strength under back-target, left-target, and right-target conditions with the control

399 trials, in which a targeting character was not presented and the participants were not required  
400 to remember a target location (Fig. 4c). Figure 4d shows the time course of the topographic  
401 activity map and the activity strengths under each condition relative to those under the  
402 control conditions. An increased activity was observed on the left-posterior area of the head.  
403 This left-posterior cluster showed a significant increase in activity during 0.5–0.6 s from the  
404 onset of targeting period under the left-target and right-target conditions ( $P < 0.05$ , initial  
405 threshold;  $P < 0.05$ , cluster-corrected for multiple comparison) although the same trend of  
406 increase in activity was observed under the back-target condition [ $t(11) = 2.42$ ,  $P = 0.03$ ,  
407 uncorrected]. To localize the brain regions contributing to the significant activity increase on  
408 the left-posterior cluster, we conducted the source analysis of MEG signal (Dale et al., 2000).  
409 The source powers were distributed largely in the parietal cortex and precuneus for the left-  
410 target and right-target conditions (Fig. 4e). We also found the source-power for the back-  
411 target condition to be distributed in the parietal cortex and precuneus although the level of  
412 source-power was smaller than those under the left-target and right-target conditions.

413 To explore the brain regions exhibiting larger neural activity under the back-target  
414 condition than under the left/right-target condition, we conducted a whole-brain analysis to  
415 compare the source-power between the two conditions, every 0.2 s after the onset of targeting  
416 period (Fig. 5a). We found a strong source-power for the back-target condition in the right  
417 MTL including the ERC during 0.2–0.4 s after the onset of targeting period. Using  
418 anatomical ROIs of each hemisphere of the whole MTL, we examined a precise time course  
419 of the source-power for the back-target and left/right-target conditions separately, relative to  
420 the control trials. The result indicated elevations in the source-power after the onset of  
421 targeting period under both back-target and left/right-target conditions relative to the control  
422 condition in both hemispheres of the MTL. However, only the right MTL exhibited a  
423 significantly larger source-power for the back-target condition than for the left/right-target

424 condition in the early phase (0.25-0.37 s) after the onset of targeting period (Fig. 5b,  $P < 0.05$ ,  
425 initial threshold;  $P < 0.05$ , spatial-temporal cluster correction for multiple comparison, two  
426 tailed). We further examined the source-power in the right MTL using the anatomical masks  
427 of its subregions and found that the source-power was larger under the back-target condition  
428 than under the left/right-target condition in all the subregions [HPC:  $t(11) = 3.00$ ,  $P = 0.048$ ;  
429 PHC:  $t(11) = 2.98$ ,  $P = 0.049$ ; PRC:  $t(11) = 3.22$ ,  $P = 0.032$ ; ERC:  $t(11) = 3.39$ ,  $P = 0.024$ ,  
430 Bonferroni-corrected for multiple comparisons ( $n = 4$ )] (Fig. 5c). Collectively, the MEG  
431 source-power contrast analyses between the back-target and left/right-target conditions  
432 indicate that the right MTL including the ERC was involved more under the back-target  
433 condition than under the left/right-target condition in the early phase (0.25-0.37 s) after the  
434 onset of targeting period, while the parietal cortex and precuneus were involved more under  
435 the left/right-target condition than under the back-target condition in the late phase (0.67-0.85  
436 s).

437 We examined the connectivity of the parietal cortex with the FEF, SMA, and MTL  
438 areas by calculating PLI using the MEG data (Stam et al., 2007). We chose the two time-  
439 windows of interests (0.08-0.48 s and 0.56-0.96 s after the onset of targeting period, see  
440 method for details) that covered the early and late phases and were revealed from the MEG  
441 source-power contrast analysis (Figs. 4&5), and subsequently, we included at least three  
442 cycles of alpha-band waves. Figure 6 shows the differences in the connectivity between the  
443 back-target and left/right-target conditions. The connectivity patterns differed significantly  
444 between the two time-windows in alpha band (8-13 Hz) but not in other bands [ $F(1, 132) =$   
445  $8.24$ ,  $P = 0.02$ , repeated-measures two-way ANOVA, Bonferroni-corrected for multiple  
446 comparisons,  $n = 4$  for frequency bands]. During the early time window, the parietal cortex  
447 showed a larger connectivity with the right ERC and PRC of the MTL under the back-target  
448 condition than under the left/right-target condition although it was statistically marginal

449 (ERC:  $t(11) = 2.16$ ,  $P = 0.06$ ; PRC:  $t(11) = 1.91$ ,  $P = 0.08$ , uncorrected). Conversely, we  
450 found a larger connectivity of the parietal cortex with the FEF ( $t(11) = 2.61$ ,  $P = 0.02$ ,  
451 uncorrected) and SMA ( $t(11) = 1.73$ ,  $P = 0.11$ , uncorrected) under the left/right-target  
452 condition than under the back-target condition during the late time window. These results  
453 were consistent with those of the functional connectivity analysis of fMRI (Fig. 3). In  
454 contrast with that in the case of the parietal cortex, we did not find a change in the  
455 connectivity of the precuneus with any of the ROIs in any frequency band across the two  
456 time-windows of interests.

## 457 **Discussion**

458 The present combined fMRI and MEG study showed the larger involvements of the parietal  
459 cortex and its associated frontal areas (i.e., FEF and SMA) in the representations of target  
460 object within the visual field than outside the visual field although the egocentric spatial  
461 information was retrieved from short-term memory in both conditions and did not depend on  
462 the incoming visual sensory signal. Conversely, a larger interaction of the parietal cortex with  
463 the MTL including the ERC was revealed by both fMRI and MEG experiments, when a  
464 target object was behind a participant, although an increasing activity of the MTL was  
465 detected by only the MEG experiment with a high temporal resolution. These results suggest  
466 the two distinct networks that represent the egocentric space inside or outside the visual field  
467 (Fig. 7).

468 Results of both fMRI and MEG experiments exhibited disproportional spatial  
469 representations around the self-body, which showed a stronger bias toward a target object  
470 within the visual field than that behind the self-body. Preferential processing of a target  
471 location within the visual field by the fronto-parietal network may be consistent with the  
472 results of previous behavioral studies reporting “front facilitation”, i.e., location of a target in  
473 front of a participant is more efficiently detected than that located behind them (Attneave,  
474 1977; Sholl, 1987; Kelly, 2009).

475 One previous human fMRI study using multi-voxel pattern analysis (MVPA) reported  
476 that the parietal cortex codes the egocentric space both inside and outside of the visual field  
477 (Schindler and Barteles, 2013), which is consistent with the finding of our previous MVPA-  
478 based study that employed the same spatial-memory task as did the present one (Zhang and  
479 Naya, 2020). However, Schindler and Barteles (2013) did not find a relationship between  
480 mean BOLD signal strength and egocentric space that was demonstrated by the present study.  
481 The reason behind this discrepancy might be difference in the type of memory engaged in

482 locating a target object between the two studies. Schindler and Barteles (2013) intensively  
483 trained participants for several days before the MRI scanning as they could remember the  
484 location of the target object from the long-term memory, which stored the fixed spatial  
485 relationship among eight objects. On the contrary, the present study prompted the participants  
486 to encode the spatial relationship of the objects involuntarily in each trial (see Methods) and  
487 remember the target location from the short-term memory. The distinct memory properties  
488 between the two studies (i.e., ‘long-term memory & voluntary encoding’ and ‘short-term  
489 memory & involuntary encoding’) may differentiate participants’ retrieval strategies, which  
490 may affect the representation of egocentric space in each study.

491         While the fronto-parietal network represents the target within the visual field, the  
492 MTL-parietal network was more involved in the spatial representations outside the visual  
493 field. However, it may also be important to note that the MEG source-power increased in the  
494 MTL for targets both inside and outside of the visual field (Figs. 5b&c). These results suggest  
495 the spreading of retrieved information from the MTL to parietal lobe (e.g., precuneus and  
496 parietal cortex), when the participants remembered a target location either inside or outside of  
497 the visual field. The spreading of memory retrieval signal from the MTL to the parietal lobe  
498 may be supported by the early increase in the MEG source-power in the MTL (Fig. 5b) (Naya  
499 et al., 2001). These findings are consistent with those of previous studies, which suggest  
500 involvements of the parietal cortex and precuneus in the recollection of episodic memory as  
501 members of the core brain system, which also includes the MTL (Schacter et al., 2007; Byrne  
502 et al., 2007).

503         The preferred involvement of the MTL-parietal network in the mental representation  
504 of the back space was supported by the fMRI connectivity analysis (Fig. 3b) in addition to the  
505 MEG study. However, only the ERC coupled with the parietal cortex in the fMRI study while  
506 the MEG study suggested the involvements of other MTL subregions in addition to the ERC.

507 This inconsistency might be due to the ill-posed nature of the MEG inverse problem (e.g. the  
508 “source leakage”), considering that a limited number of magnetic-field sensors yielded  
509 insufficient activity that discriminated among thousands of source points particularly for  
510 neighboring regions (de Peralta-Menendez and Gonzalez-Andino, 1998; Sato et al., 2004;  
511 Colclough et al., 2015). The MEG source-power in the other MTL subregions might thus be  
512 caused by the signal leakage from the ERC. Another possibility might be that the MEG signal  
513 reflected synchronized activity at each instantaneous time point and would be more sensitive  
514 to the transient neuronal operation than is the fMRI connectivity analysis, which is based on  
515 the averaged BOLD signal (Logothetis et al., 2001) in each TR (2 s). In either case, the ERC  
516 might play a key role in the MTL-parietal network for the representation of a retrieved target  
517 location, which is consistent with the results of previous studies that examined response  
518 properties of the ERC neurons (e.g., grid cells, head direction cells) in both rodents (Hafting,  
519 et al, 2005; Hargreaves et al., 2005; Howard et al. 2014; Chadwick et al. 2015; Wang et al,  
520 2018) and primates (Doeller et al., 2010; Killian et al., 2012; Wilming et al., 2018).  
521 Importantly, the primate ERC reportedly represents the external space according to the gaze  
522 position and even in imagined navigation (Horner et al., 2016). In contrast to the ERC, other  
523 MTL subregions might be involved in the retrieval of the target location (Yang and Naya,  
524 2020). Considering the high performance of the present spatial-memory task and the post-  
525 scan interview showing no strategic retrieval efforts by the participants, the retrieval process  
526 might only be transient in the present experimental paradigm, which could be detected more  
527 efficiently by MEG than by fMRI.

528 MEG connectivity analysis using PLI revealed the preferential increase in  
529 synchronization at alpha-band frequency (8-13 Hz) for both fronto-parietal and MTL-parietal  
530 networks inside and outside of the visual field, respectively. These findings were consistent  
531 with previous MEG and EEG studies, which suggest functional roles of alpha-band phase



532 synchrony in long-range communications across distant brain regions including the parietal  
533 cortex (Desburg et al., 2009; Sadaghiani et al., 2012; Takahashi and Kitazawa, 2017; Lobier  
534 et al., 2018). One remaining question is that of the functional significance of increased  
535 involvements of the MTL-parietal network in the representation of a retrieved target behind  
536 the participants. In the present spatial-memory paradigm, the participants obtained the  
537 egocentric location of a target located either inside or outside of the visual field from their  
538 short-term memory (Zhang and Naya 2020). It should be noted here that the task required the  
539 participants to identify the location of the target object that was present around them in the  
540 virtual environment. In our daily life, we usually perceive and attend targets within the visual  
541 field for the subsequent action (Ohbayashi et al., 2003 Science) while we, sometimes, retrieve  
542 a target behind us from short-term memory, the contents of which have already passed by in  
543 our spatiotemporal space (Naya and Suzuki, 2011; Eichenbaum, 2014; Tsao et al., 2018) (Fig.  
544 7). We may thus combine the back scene, which we encoded just before retrieval, with the  
545 mental representation of the present external world. This assumption suggests that the MTL-  
546 parietal network may serve more for the representation of the back space than for that of the  
547 front space although future studies should elucidate additional neuronal operations required  
548 for representing the scene behind self-body. Collectively, our results indicate that the parietal  
549 cortex may represent the whole space around self-body by coordinating the fronto-parietal  
550 network for the target inside and the MTL-parietal network for the target outside the visual  
551 field, corresponding to the future and past relative to the present time point.

552 **Reference**

553

554 Attneave F, Farrar P (1977) The visual world behind the head. *Am J Psychol*

555 90:549–563.

556

557 Amador N, Fried I (2004) Single-neuron activity in the human supplementary motor

558 area underlying preparation for action. *J Neurosurg* 100:250–259.

559

560 Burgess N (2006) Spatial memory: how egocentric and allocentric combine. *Trends*

561 *Cogn Sci* 10:551–557.

562

563 Bisiach E, Luzzatti C (1978) Unilateral neglect of representational

564 space. *Cortex* 14:129–133.

565

566 Byrne P, Becker S, Burgess N (2007) Remembering the past and imagining the

567 future: a neural model of spatial memory and imagery. *Psychol Rev* 114:340–375.

568

569 Chadwick MJ, Jolly AE, Amos DP, Hassabis D, Spiers HJ (2015) A goal direction

570 signal in the human entorhinal/subicular region. *Curr Biol* 25:87–92.

571

572 Colclough GL, Woolrich MW, Tewarie PK, Brookes MJ, Quinn AJ, Smith SM (2016)

573 How reliable are MEG resting-state connectivity metrics? *Neuroimage* 138:284–293.

574

575 Ciaramelli E, Rosenbaum RS, Solcz S, Levine B, Moscovitch M (2010) Mental space  
576 travel: damage to posterior parietal cortex prevents egocentric navigation and  
577 reexperiencing of remote spatial memories. *J Exp Psychol Learn Mem Cogn* 36:619.  
578

579 Colby CL, Duhamel JR, Goldberg ME (1995) Oculocentric spatial representation in  
580 parietal cortex. *Cereb Cortex* 5:470–481.  
581

582 Colclough GL, Brookes MJ, Smith SM, Woolrich MW (2015) A symmetric  
583 multivariate leakage correction for MEG connectomes. *Neuroimage* 117:439–448.  
584

585 Dale AM, Liu AK, Fischl BR, Buckner RL, Belliveau JW, Lewine JD, Halgren E (2000)  
586 Dynamic statistical parametric mapping: combining fMRI and MEG for high-  
587 resolution imaging of cortical activity. *Neuron* 26:55–67.  
588

589 Doesburg SM, Green JJ, McDonald JJ, Ward LM (2009) From local inhibition to  
590 long-range integration: a functional dissociation of alpha-band synchronization  
591 across cortical scales in visuospatial attention. *Brain Res* 1303:97–110.  
592

593 Desmurget M, Epstein CM, Turner RS, Prablanc C, Alexander GE, Grafton ST (1999)  
594 Role of the posterior parietal cortex in updating reaching movements to a visual  
595 target. *Nat Neurosci* 2:563–567.  
596

597 Donner T, Kettermann A, Diesch E, Ostendorf F, Villringer A, Brandt SA (2000)  
598 Involvement of the human frontal eye field and multiple parietal areas in covert visual  
599 selection during conjunction search. *Eur J Neurosci* 12:3407–3414.

600

601 Duvernoy HM (2005) The human hippocampus: functional anatomy, vascularization  
602 and serial sections with MRI. New York, NY: Springer Science & Business Media.

603

604 de Peralta-Menendez RG, Gonzalez-Andino SL (1998) A critical analysis of linear  
605 inverse solutions to the neuroelectromagnetic inverse problem. *IEEE Trans Biomed*  
606 *Eng* 45:440–448.

607

608 Doeller CF, Barry C, Burgess N (2010) Evidence for grid cells in a human memory  
609 network. *Nature* 463:657–661.

610

611 Eichenbaum H, Cohen NJ (2014) Can we reconcile the declarative memory and  
612 spatial navigation views on hippocampal function? *Neuron* 83:764–770.

613

614 Fischl B, Sereno MI, Tootell RB, Dale AM (1999) High-resolution intersubject  
615 averaging and a coordinate system for the cortical surface. *Hum Brain Mapp* 8:272–  
616 284.

617

618 Gramfort A, Luessi M, Larson E, Engemann DA, Strohmeier D, Brodbeck C, Goj R,  
619 Jas M, Brooks T, Parkkonen L, Hämäläinen M (2013) MEG and EEG data analysis  
620 with MNE-Python. *Front Neurosci* 7:267.

621

622 Gramfort A, Luessi M, Larson E, Engemann DA, Strohmeier D, Brodbeck C,  
623 Parkkonen L, Hämäläinen MS (2014) MNE software for processing MEG and EEG  
624 data. *Neuroimage* 86:446–460.

- 625
- 626 Goodale MA, Milner AD (1992) Separate visual pathways for perception and action.
- 627 Trends Neurosci 15:20–25.
- 628
- 629 Grenander U (1959) Probability and Statistics: The Harald Cramér Volume. New
- 630 York, NY: Almqvist & Wiksell.
- 631
- 632 Hu L, Zhang Z (2019) EEG Signal Processing and Feature Extraction. Singapore:
- 633 Springer Singapore.
- 634
- 635 Hanes DP, Thompson KG, Schall JD (1995) Relationship of presaccadic activity in
- 636 frontal eye field and supplementary eye field to saccade initiation in macaque:
- 637 Poisson spike train analysis. Exp Brain Res 103:85–96.
- 638
- 639 Hafting T, Fyhn M, Molden S, Moser MB, Moser EI (2005) Microstructure of a spatial
- 640 map in the entorhinal cortex. Nature 436:801–806.
- 641
- 642 Hargreaves EL, Rao G, Lee I, Knierim JJ (2005) Major dissociation between medial
- 643 and lateral entorhinal input to dorsal hippocampus. Science 308:1792–1794.
- 644
- 645 Horner AJ, Bisby JA, Zotow E, Bush D, Burgess N (2016) Grid-like processing of
- 646 imagined navigation. Curr Biol 26:842–847.
- 647
- 648 Insausti R, Juottonen K, Soininen H, Insausti AM, Partanen K, Vainio P, Laakso MP,
- 649 Pitkänen A (1998) MR volumetric analysis of the human entorhinal, perirhinal, and
- 650 temporopolar cortices. AJNR Am J Neuroradiol 19:659–671.

651

652 Jenkinson M, Smith S (2001) A global optimisation method for robust affine  
653 registration of brain images. *Med Image Anal* 5:143–156.

654

655 Jenkinson M, Bannister P, Brady M, Smith S (2002) Improved optimization for the  
656 robust and accurate linear registration and motion correction of brain  
657 images. *Neuroimage* 17:825–841.

658

659 Knapp A (1938) An Introduction to Clinical Perimetry. *Arch Ophthalmol* 20:1116–  
660 1117.

661

662 Kelly JW, McNamara TP (2009) Facilitated pointing to remembered objects in front:  
663 Evidence for egocentric retrieval or for spatial priming? *Psychon Bull Rev* 16:295–  
664 300.

665

666 Killian NJ, Jutras MJ, Buffalo EA (2012) A map of visual space in the primate  
667 entorhinal cortex. *Nature* 491:761–764.

668

669 Khan AZ, Blangero A, Rossetti Y, Salemme R, Luauté J, Deubel H, Schneider WX,  
670 Laverdure N, Rode G, Boisson D, Pisella L (2008) Parietal damage dissociates  
671 saccade planning from presaccadic perceptual facilitation. *Cereb Cortex* 19:383–387.

672

673 Lobier M, Palva JM, Palva S (2018) High-alpha band synchronization across frontal,  
674 parietal and visual cortex mediates behavioral and neuronal effects of visuospatial  
675 attention. *Neuroimage* 165:222–237.

676

677 Logothetis NK, Pauls J, Augath M, Trinath T, Oeltermann A (2001)

678 Neurophysiological investigation of the basis of the fMRI signal. *Nature* 412:150–157.

679

680 Iriki A, Taoka M (2012) Triadic (ecological, neural, cognitive) niche construction: a

681 scenario of human brain evolution extrapolating tool use and language from the

682 control of reaching actions. *Philos Trans R Soc Lond B Biol Sci* 367:10–23.

683

684 Merriam EP, Genovese CR, Colby CL (2003) Spatial updating in human parietal

685 cortex. *Neuron* 39:361–373.

686

687 Nichols TE, Holmes AP (2002) Nonparametric permutation tests for functional

688 neuroimaging: a primer with examples. *Hum Brain Mapp* 15:1–25.

689

690 Presson CC, Hazelrigg MD (1984) Building spatial representations through primary

691 and secondary learning. *J Exp Psychol Learn Mem Cogn* 10:716–722.

692

693 Pruessner JC, Li LM, Serles W, Pruessner M, Collins DL, Kabani N, Lupien S, Evans

694 AC (2000) Volumetry of hippocampus and amygdala with high-resolution MRI and

695 three-dimensional analysis software: minimizing the discrepancies between

696 laboratories. *Cereb Cortex* 10:433–442.

697

698 Pruessner JC, Köhler S, Crane J, Pruessner M, Lord C, Byrne A, Kabani N, Collins

699 DL, Evans AC (2002) Volumetry of temporopolar, perirhinal, entorhinal and

700 parahippocampal cortex from high-resolution MR images: considering the variability  
701 of the collateral sulcus. *Cereb Cortex* 12:1342–1353.

702

703 Rolls ET, Joliot M, Tzourio-Mazoyer N (2015) Implementation of a new parcellation  
704 of the orbitofrontal cortex in the automated anatomical labeling  
705 atlas. *Neuroimage* 122:1–5.

706

707 Stein JF (1989) Representation of egocentric space in the posterior parietal  
708 cortex. *Q J Exp Physiol* 74:583–606.

709

710 Stein JF (1992) The representation of egocentric space in the posterior parietal  
711 cortex. *Behav Brain Sci* 15:691–700.

712

713 Sadaghiani S, Scheeringa R, Lehongre K, Morillon B, Giraud AL, D'Esposito M,  
714 Kleinschmidt A (2012) Alpha-band phase synchrony is related to activity in the  
715 fronto-parietal adaptive control network. *J Neurosci* 32:14305–14310.

716

717 Sholl MJ (1987) Cognitive maps as orienting schemata. *J Exp Psychol Learn Mem*  
718 *Cogn* 13:615–628.

719

720 Shelton AL, McNamara TP (1997) Multiple views of spatial memory. *Psychon Bull*  
721 *Rev* 4:102–106.

722

723 Schindler A, Bartels A (2013) Parietal cortex codes for egocentric space beyond the  
724 field of view. *Curr Biol* 23:177–182.



725

726 Suarez-Jimenez B, Bisby JA, Horner AJ, King JA, Pine DS, Burgess N (2018) Linked  
727 networks for learning and expressing location-specific threat. *Proc Natl Acad Sci U S*  
728 *A* 115:E1032–E1040.

729

730 Stam CJ, Nolte G, Daffertshofer A (2007) Phase lag index: assessment of functional  
731 connectivity from multi channel EEG and MEG with diminished bias from common  
732 sources. *Hum Brain Mapp* 28:1178–1193.

733

734 Sato MA, Yoshioka T, Kajihara S, Toyama K, Goda N, Doya K, Kawato M (2004)  
735 Hierarchical Bayesian estimation for MEG inverse problem. *Neuroimage* 23:806–826.

736

737 Tanji J, Shima K (1994) Role for supplementary motor area cells in planning several  
738 movements ahead. *Nature* 371:413–416.

739

740 Takahashi T, Kitazawa S (2017) Modulation of illusory reversal in tactile temporal  
741 order by the phase of posterior  $\alpha$  rhythm. *J Neurosci* 37:5298–5308.

742

743 Ungerleider LG, Haxby JV (1994) ‘What’ and ‘where’ in the human brain. *Curr Opin*  
744 *Neurobiol* 4:157–165.

745

746 Vallar G (1998) Spatial hemineglect in humans. *Trends Cogn Sci* 2:87–97.

747

748 Wilming N, König P, König S, Buffalo EA (2018) Entorhinal cortex receptive fields are  
749 modulated by spatial attention, even without movement. *Elife* 7:e31745.

750

751 Wang X, Fung CA, Guan S, Wu S, Goldberg ME, Zhang M (2016) Perisaccadic  
752 receptive field expansion in the lateral intraparietal area. *Neuron* 90:400–409.

753

754 Yang C, Naya Y (2020) Hippocampal cells integrate past memory and present  
755 perception for the future. *BioRxiv* doi: <https://doi.org/10.1101/2020.03.08.982355>

756

757 Zhang B, Naya Y (2020) Medial prefrontal cortex represents the object-based  
758 cognitive map when remembering an egocentric target location. *Cereb Cortex*  
759 bhaa117.

760

761 Zhou Y, Friston KJ, Zeidman P, Chen J, Li S, Razi A (2018) The hierarchical  
762 organization of the default, dorsal attention and salience networks in adolescents  
763 and young adults. *Cereb Cortex* 28:726–737.

764

765

## 766 Figure Legends

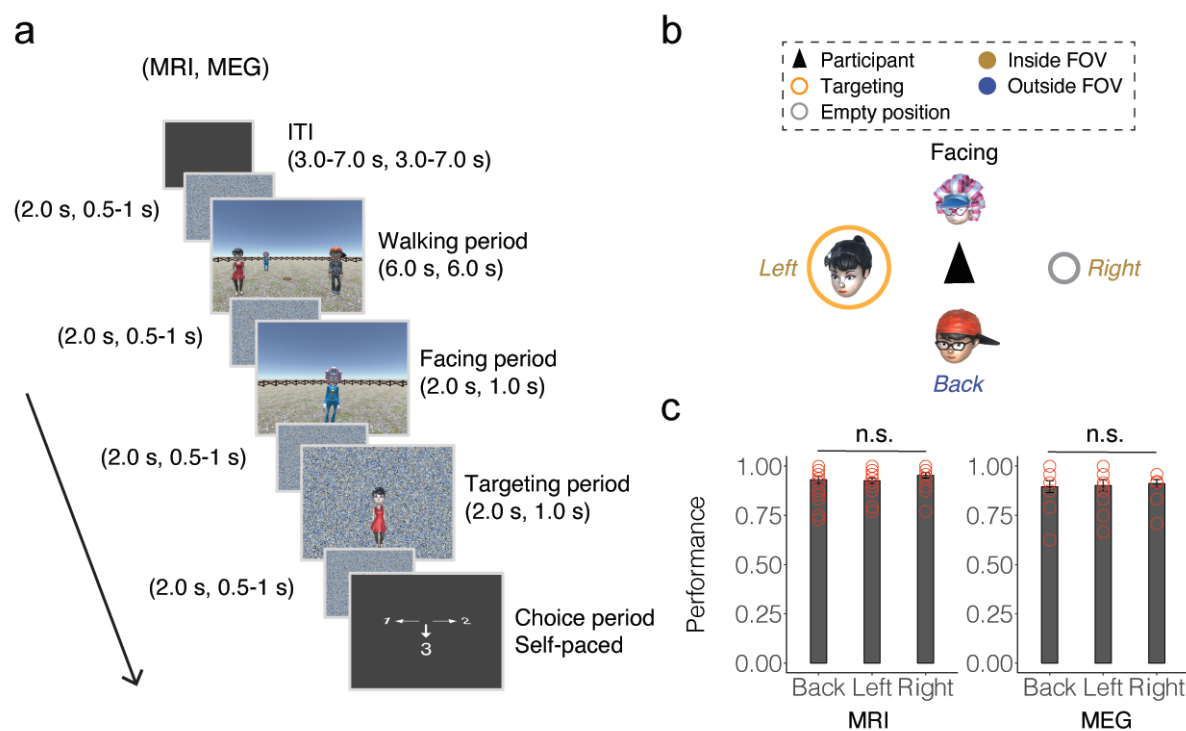

767

768 Figure 1. a) Spatial-memory task paradigm. Each trial consisted of four periods. Walking  
 769 period: participants walked toward three human characters using the first-person perspective  
 770 and stopped on a wood plate in the center. Facing period: one of the human characters was  
 771 presented, indicating the participant's current self-orientation. Targeting period: a photo of  
 772 target character was presented on the scrambled background. Choice period: the participants  
 773 chose the direction of the target character relative to their body upon the presentation of a  
 774 response cue. b) An example of the spatial relationship between a participant and the human  
 775 characters. Left-target and right-target conditions (yellow) are inside the visual field. Back-  
 776 target condition (blue) is outside the visual field. c) Performance of participants with regard  
 777 to the three egocentric directions in MRI and MEG experiments. Error bar indicates SEM.  
 778 n.s., no statistical significance detected by repeated-measures one-way ANOVA.

779

780

**a**

MRI contrast: Left/right - back

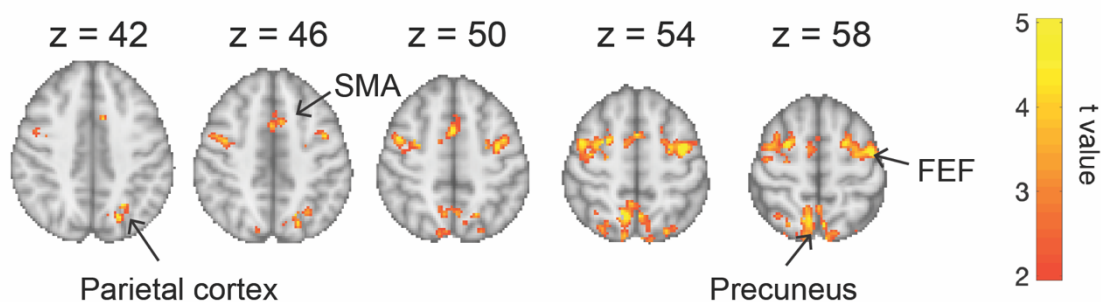

**b**

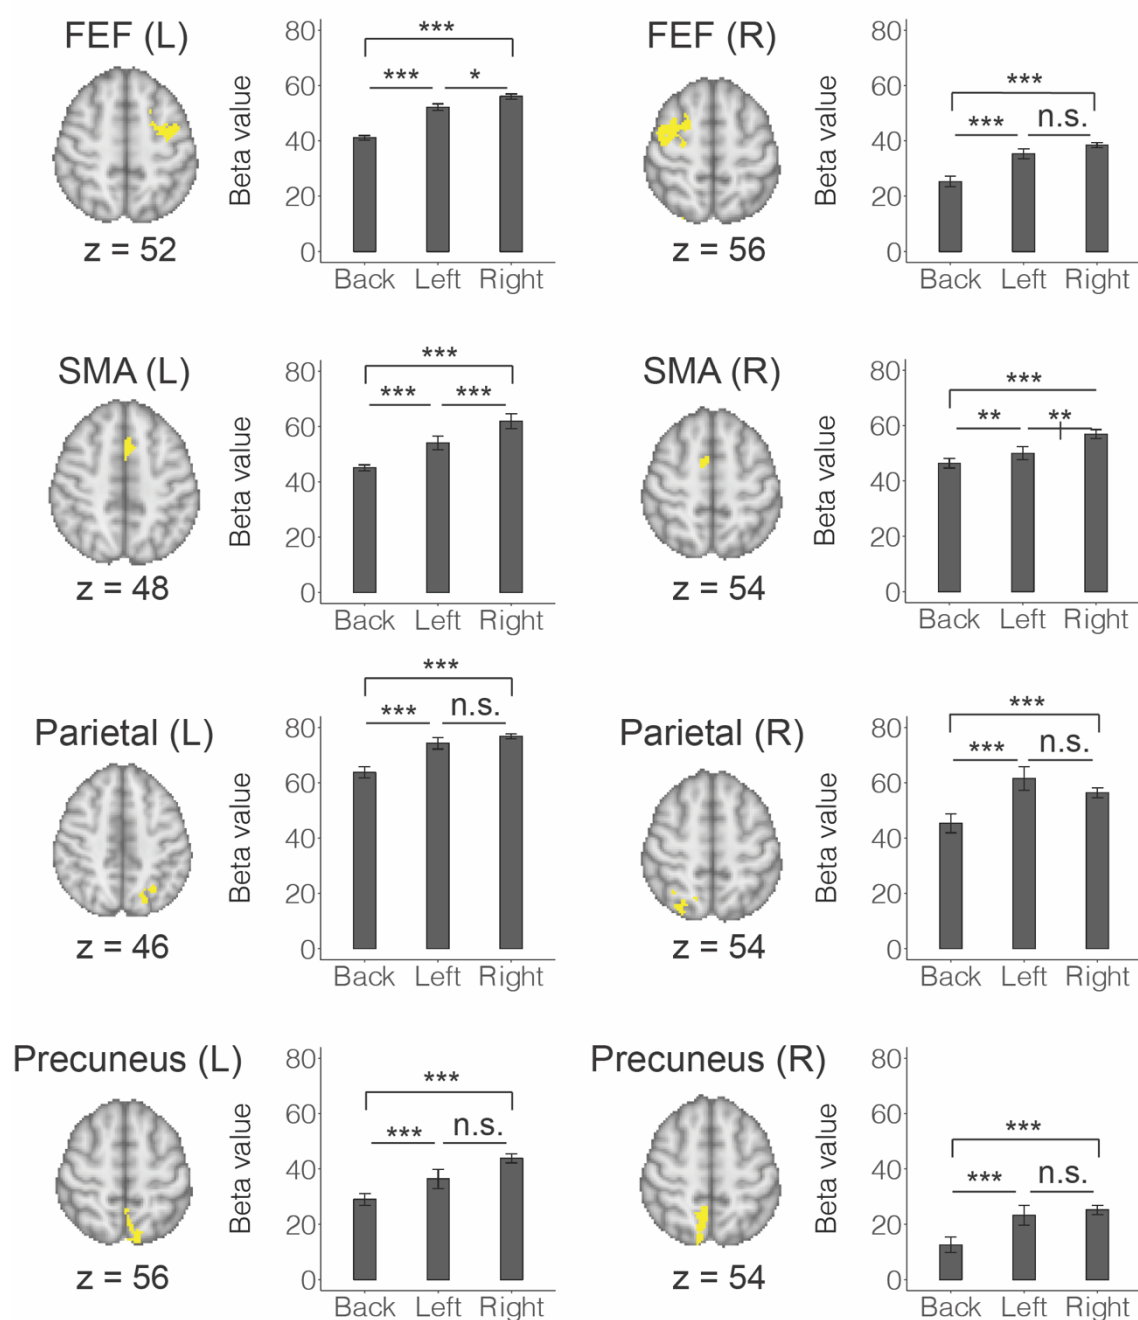

782 Figure 2. a) MRI contrast left/right–back condition: significant clusters were revealed in the  
783 parietal cortex, precuneus, FEF, and SMA, while no significant cluster was found for the  
784 back-target condition relative to the left/right-target condition (cluster-corrected for multiple  
785 comparison, initial threshold  $P = 0.01$ ). b) BOLD signal in the functional ROIs derived from  
786 Fig. 2a for each of the left-target, right-target, and back-target conditions. All ROIs showed  
787 significant BOLD signal changes across the three conditions according to repeated-measures  
788 one-way ANOVA ( $P < 0.05$ , Bonferroni-corrected for multiple comparisons for the ROIs,  $n$   
789 = 8). \*  $P < 0.05$ , \*\*  $P < 0.01$ , \*\*\*  $P < 0.001$ , two-tailed t-test, Bonferroni-corrected for  
790 multiple comparisons for the conditions ( $n = 3$ ). Error bar indicates SEM.  
791

a

MRI connectivity contrast: Left/right - back

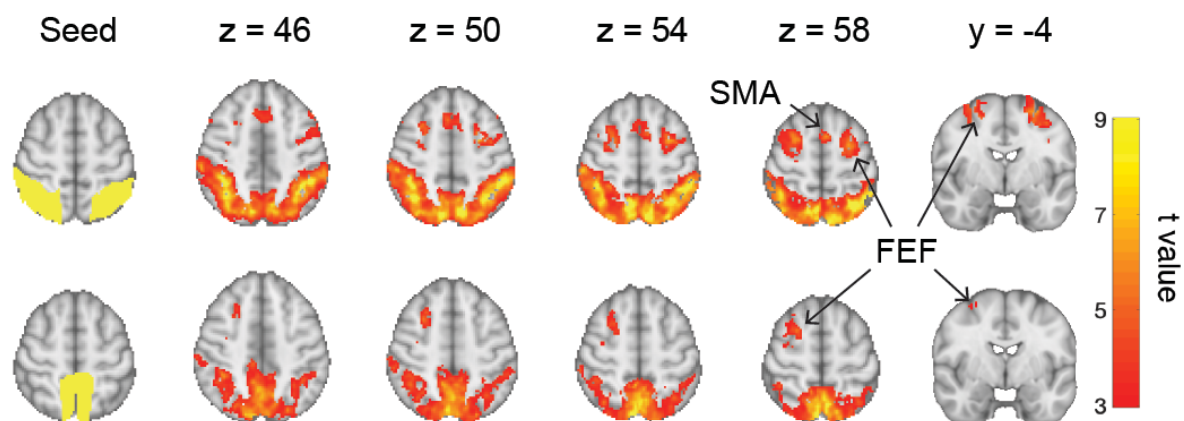

b

MRI connectivity contrast: back - Left/right

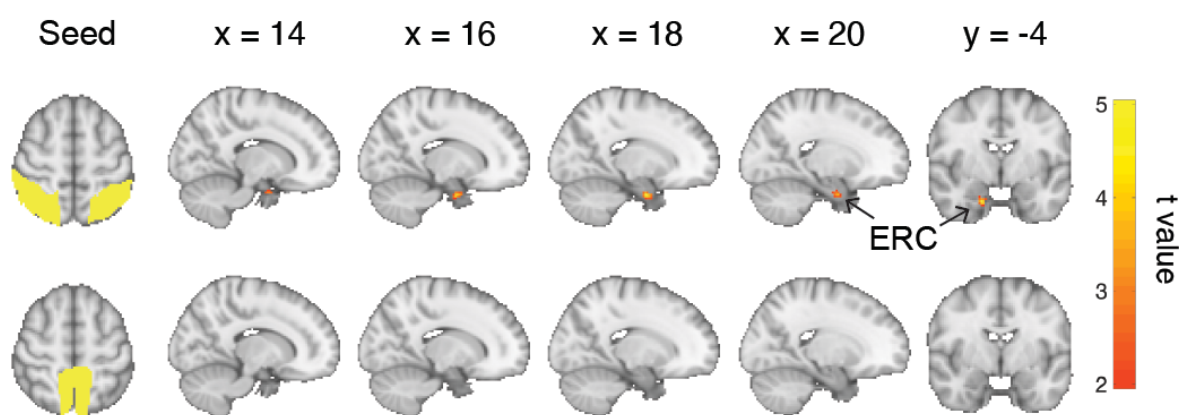

792

793 Figure 3. MRI connectivity contrast of “left/right–back” and “back–left/right” conditions

794 using the parietal cortex and precuneus as seeds. a) For the “left/right–back,” condition

795 significant connection was found in the parietal cortex, precuneus, FEF, and SMA for both

796 seeds ( $P < 0.01$ , initial threshold,  $P < 0.05$ , cluster-corrected for multiple comparison); b) For

797 the “back–left/right,” an increased connectivity was revealed between the parietal cortex and

798 right ERC, which survived for small volume correction based on the mask of bilateral MTL

799 ( $P < 0.01$ , initial threshold,  $P < 0.05$ , cluster-corrected for multiple comparison); no

800 connection was found between precuneus and MTL regions.

801



**a**

MEG contrast: Left/right - back

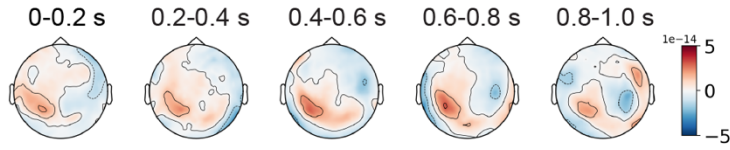

**b**

0.67-0.85 s

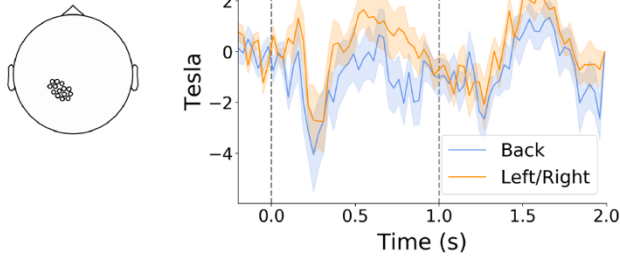

**c**

SMT (MEG) Control (MEG)

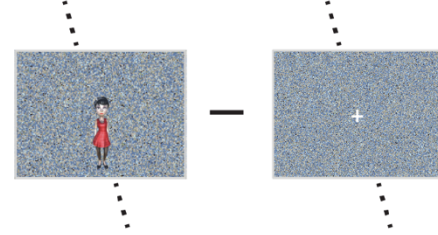

**d**

MEG contrast: back, left, right - control

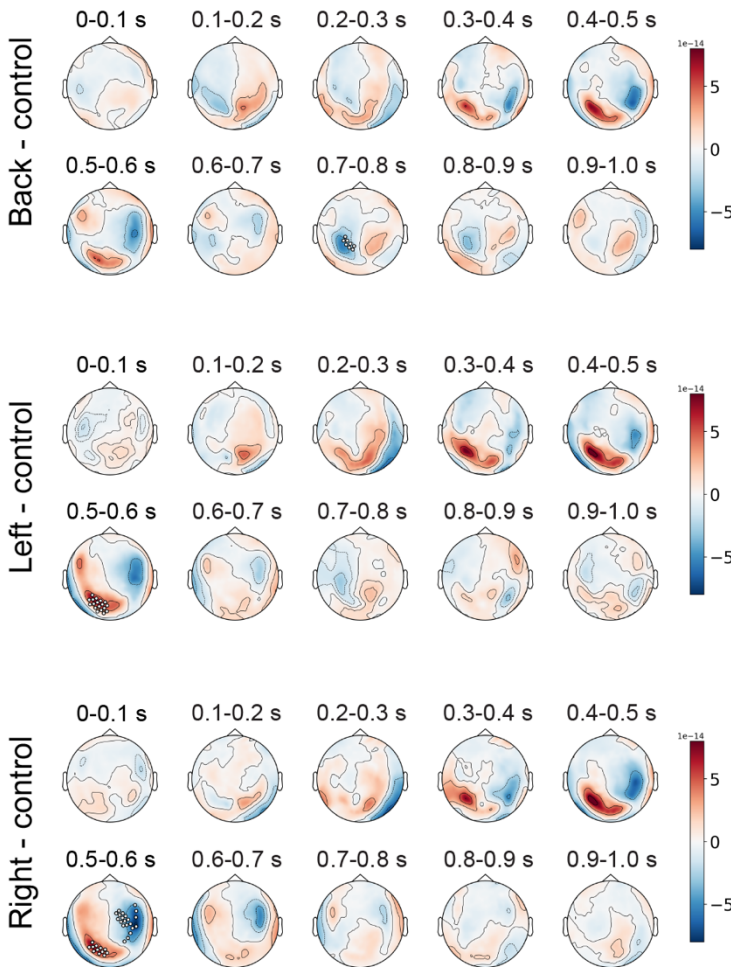

**e**

Source power in 0.5-0.6 s

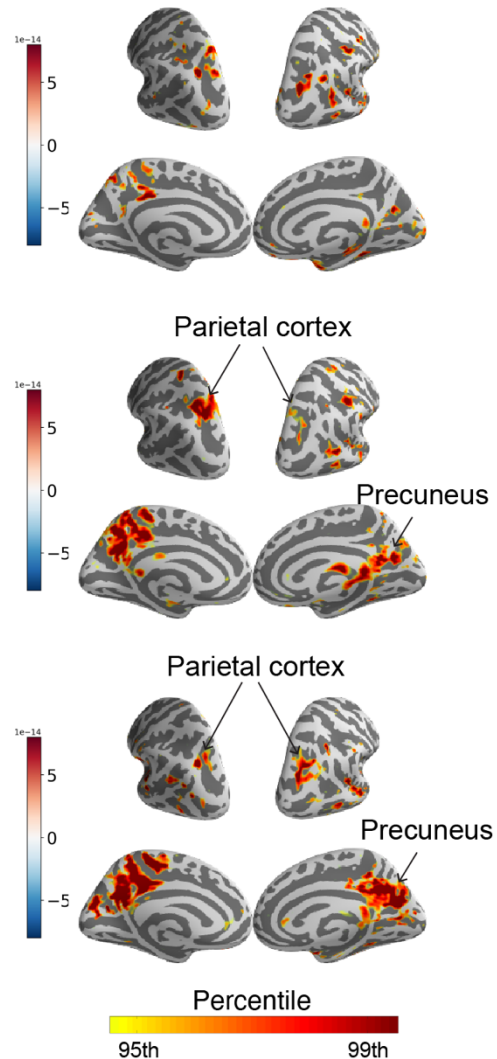

803 Figure 4. a) Mean topographic map for the MEG contrast of “left/right–back” condition for  
804 every 0.2 s during the targeting period. b) Time courses of the signal strength on the left-  
805 posterior cluster of sensors in the back-target and left/right-target conditions. A significantly  
806 higher activity was found for the left/right-target condition relative to the back-target  
807 condition 0.67–0.85 s after the onset of the targeting period ( $P < 0.05$ , initial threshold,  $P <$   
808  $0.05$ , spatial-temporal cluster correction for multiple comparison, two tailed). c) A  
809 comparison between the spatial-memory task (SMT) trials and the control trials in the MEG  
810 experiment. d) Mean topographic map for each of the left-target, right-target, and back-target  
811 conditions relative to the control condition for every 0.1 s during the targeting period.  
812 Significant clusters were found in the left-posterior from 0.5 to 0.6 s for the left-target and  
813 right-target conditions ( $P < 0.05$ , initial threshold;  $P < 0.05$ , cluster-corrected for multiple  
814 comparison, two tailed) but not for the back-target condition. e) Source-power distribution on  
815 brain surface for each of the three conditions relative to the control within 0.5–0.6 s. Color  
816 bar represents percentile rank of source-power strength.

817



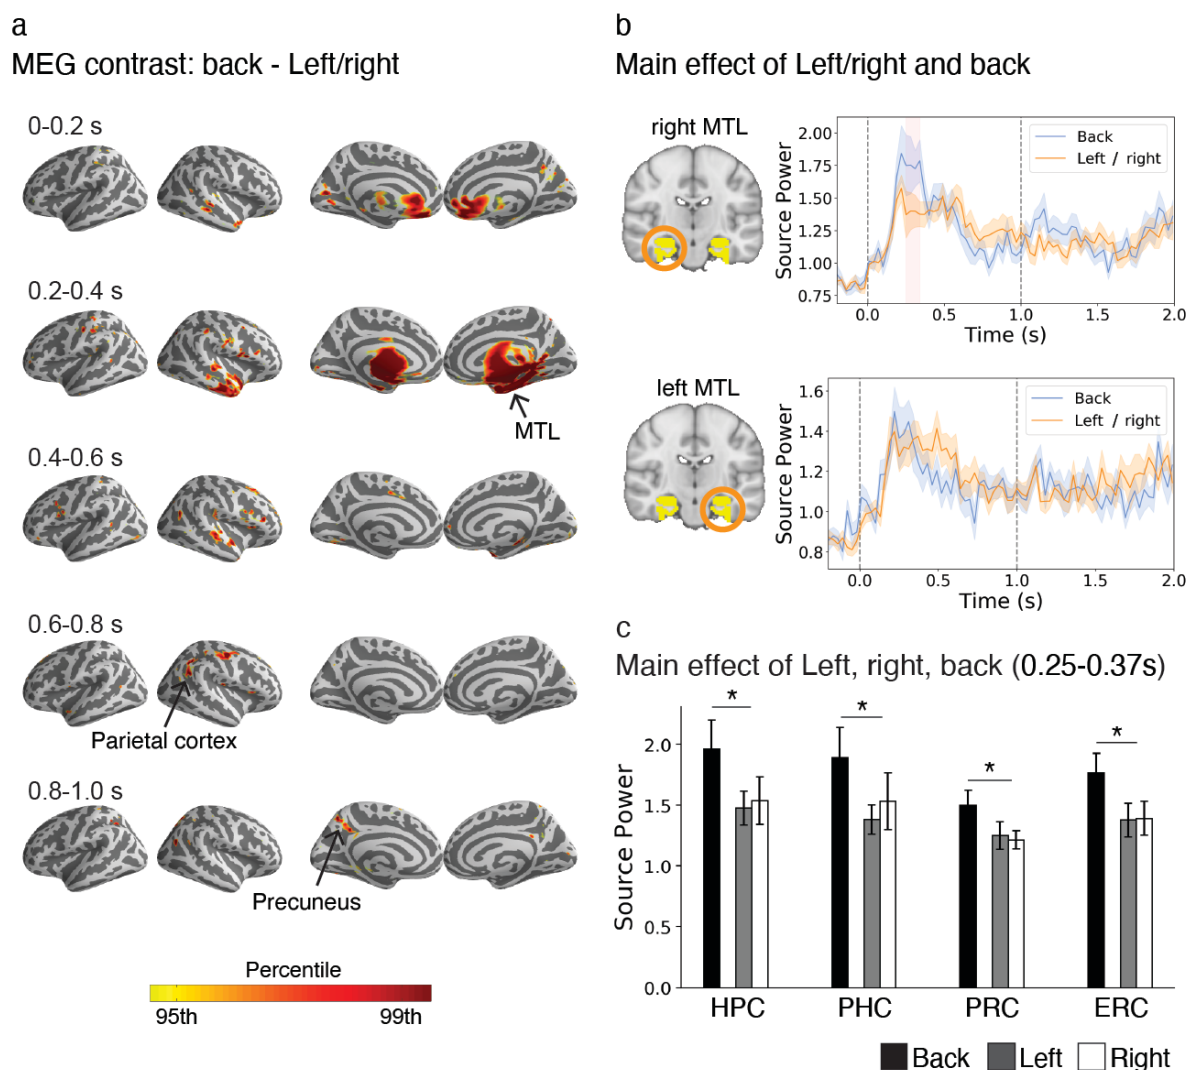

818

819 Figure 5. a) MEG contrast of “back–left/right” condition in source-power for every 0.2 s  
820 during the targeting period. Color bar represents percentile rank of source-power strength.. b)

821 ROI analysis for both hemispheres of the MTL. Shaded area in the top panel (right MTL)

822 show a significantly higher the source-power for the back-target condition than for the

823 left/right-target condition 0.25–0.37 s after the onset of targeting period ( $P < 0.05$ , spatial-

824 temporal cluster correction for multiple comparison, two tailed). c) ROI analysis of the

825 source-power in each of the right MTL subregions for each condition. \*  $P < 0.05$ ,  $t(11) =$

826 3.00, 2.98, 3.22, and 3.39 for HPC, PHC, PRC, and ERC, respectively, two tailed,

827 Bonferroni-corrected for multiple comparisons ( $n = 4$ ). Error bar represents SEM.

828

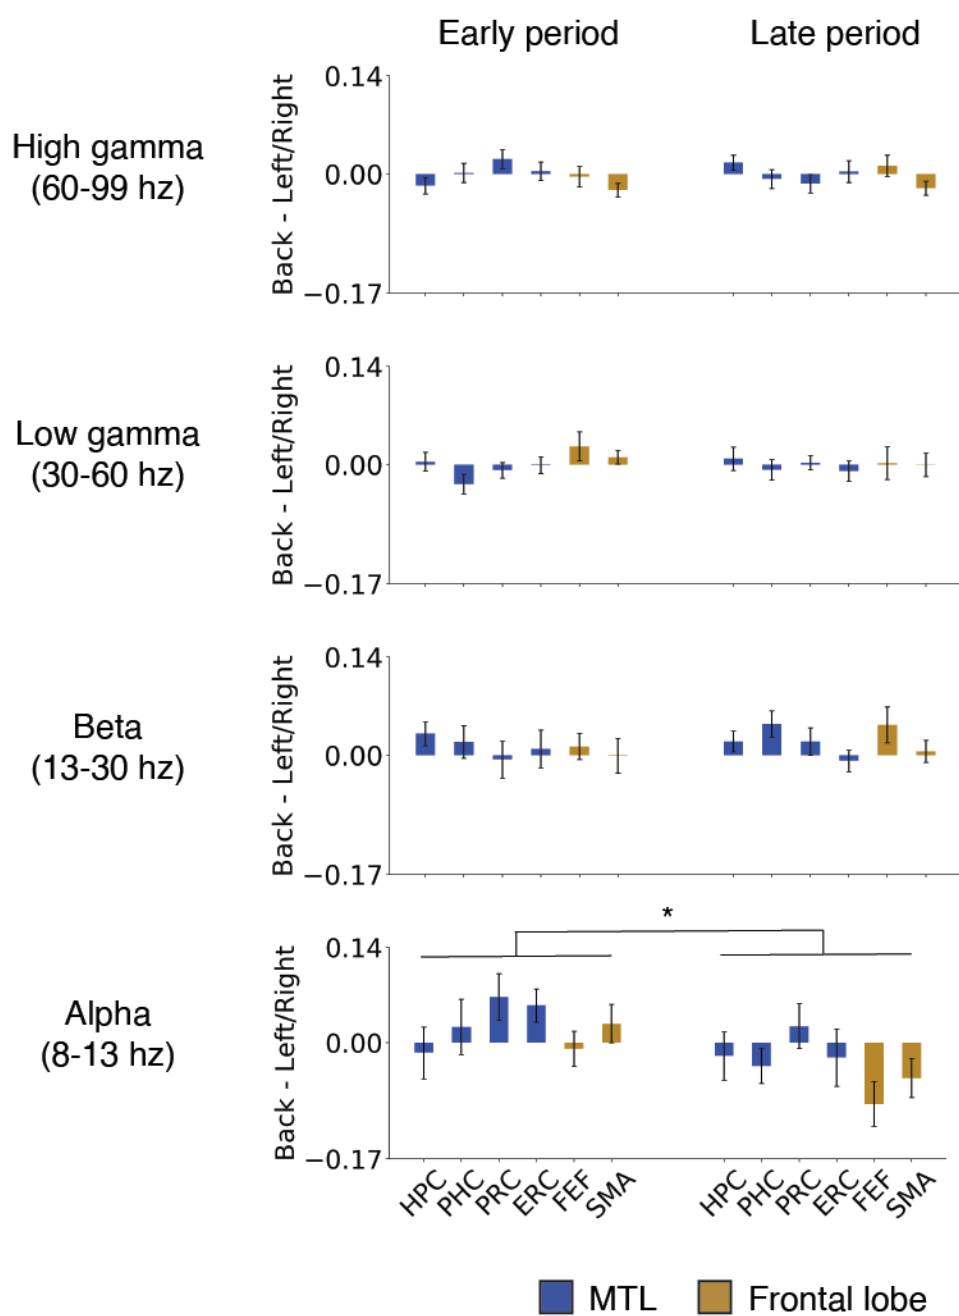

829

830 Figure 6. MEG connectivity contrast of the "back-left/right" conditions using the parietal  
 831 cortex as a seed. The connectivity with each of six anatomical ROIs was estimated for alpha,  
 832 beta, and gamma frequency bands using PLI during the early phase (0.08-0.48 s) and late  
 833 phase (0.56-0.96 s). \*  $P = 0.02$ ,  $F(2, 132) = 8.24$ , a main effect of time-windows (early vs.  
 834 late), repeated-measures two-way ANOVA with brain areas as another main effect,  
 835 Bonferroni-corrected for multiple comparisons of frequency bands ( $n = 4$ ).

836

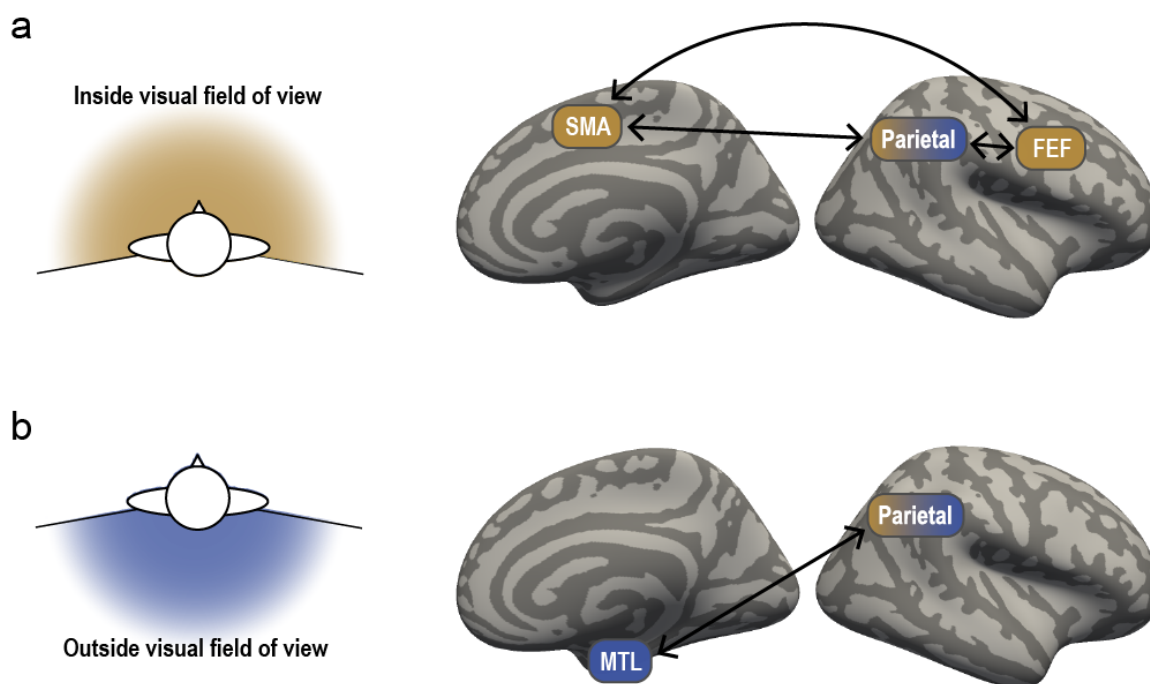

837

838 Figure 7. Two brain networks responsible for the egocentric space inside and outside of the  
839 visual field. a) The fronto-parietal network represents target in the visual field (yellow shade).

840 The FEF and SMA are included in this network to represent the space in front for a

841 subsequent action. b) The MTL-parietal network represents a target outside the visual field

842 (blue shade). The right MTL, particularly ERC, is recruited in this network to represent a

843 target behind the self-body. In the present spatial memory task, the target location was

844 retrieved from the short-term memory, which a participant encoded just before retrieval

845 without a voluntary effort to memorize it.
